# Supplementary material
Source: PubMed Central journal article supplement (PMC8491676)

**a**

|                        | Fast Spiking | Regular Spiking | Delayed Excitation | Single Spiking |
|------------------------|--------------|-----------------|--------------------|----------------|
| RMP (mV)               | -58.6±1.98   | -49.7±7.3       | -46.0±6.0          | -52.5±16.5     |
| Capacitance (pF)       | 30.2±3.83    | 21.6±4.9        | 22.7±6.5           | 31.1±6.1       |
| Access resistance (MΩ) | 15.7±1.5     | 14.4±3.4        | 19.4±3.7           | 19.0±9.3       |
| Time constant (ms)     | 7.6±0.8      | 9.0±2.8         | 7.1±1.8            | 3.9±2.2        |
| Input resistance(MΩ)   | 195.6±41.9   | 258.1±100.5     | 304.7±29.6         | 66.3±3.6       |
| Rheobase (pA)          | 120.7±21.4   | 16.7±6.7        | 10.0±0.00          | 210.0±130.0    |
| Spike threshold (mV)   | -37.6±1.28   | -35.9±4.11      | -36.0±5.0          | -41.0±8.44     |
| Spike Amplitude (mV)   | 52.4±2.56    | 54.5±16.1       | 23.7±6.8           | 42.3±23.6      |
| Spike half width (ms)  | 0.83±0.08    | 2.1±0.81        | 1.74±0.32          | 1.22±0.88      |
| fAHP Amplitude (mV)    | 17.2±0.90    | 9.81±2.9        | 4.0±1.2            | 11.6±6.9       |
| n                      | 28           | 3               | 2                  | 2              |

**b**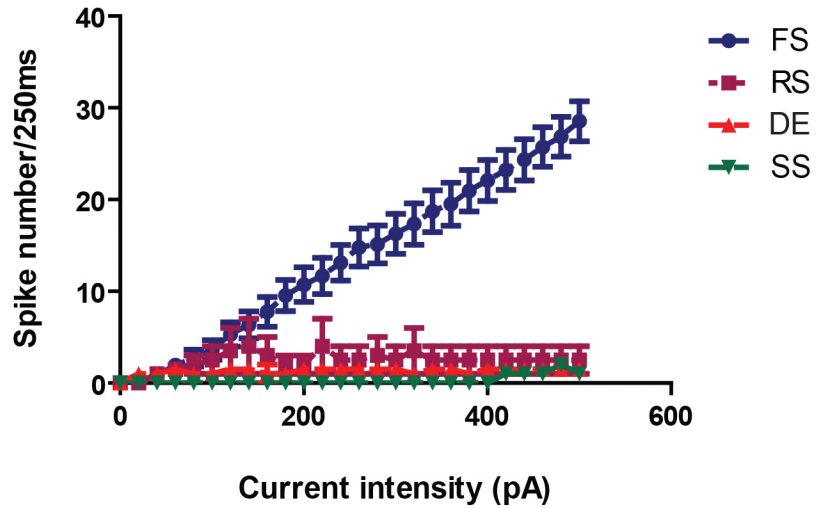

Supplement: supfig6_intrinsic_resub_bhab152.pdf [file supfig6_intrinsic_resub_bhab152.pdf]
