# Supplementary material
Source: PubMed Central journal article supplement (PMC8491676)

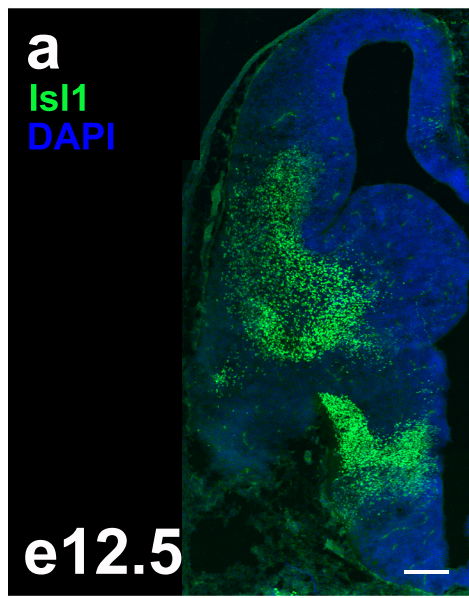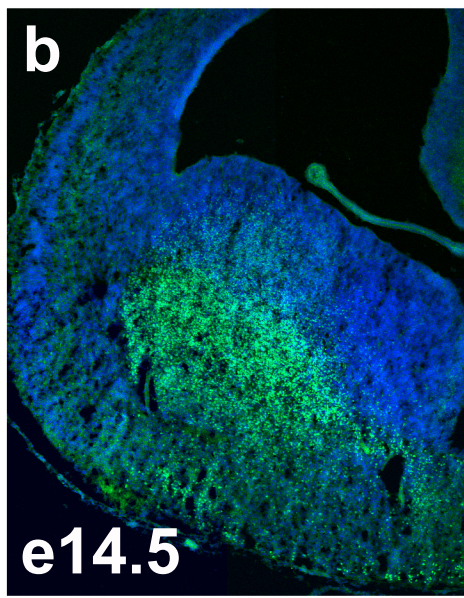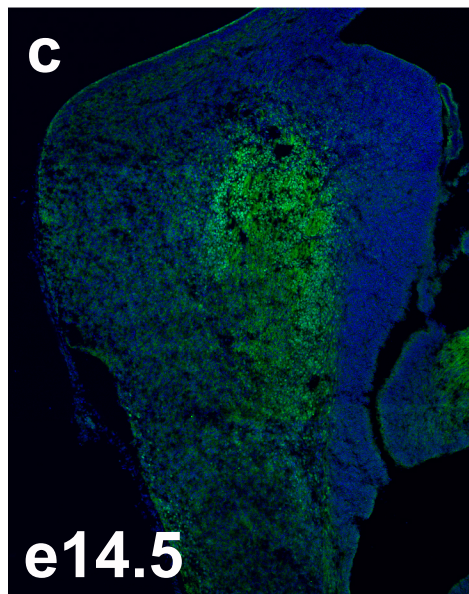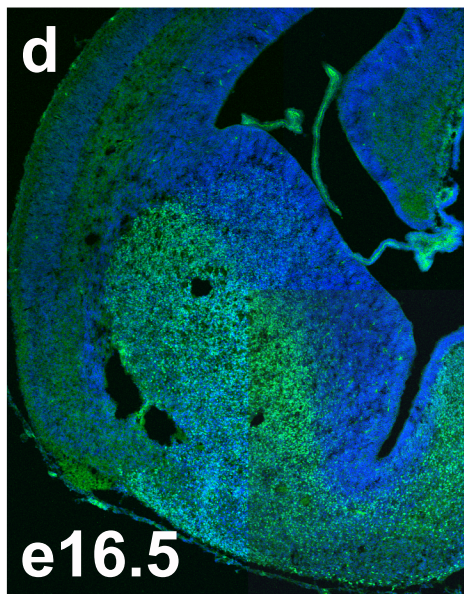

Supplement: supfig1_wt_isl1_resub_bhab152.pdf [file supfig1_wt_isl1_resub_bhab152.pdf]

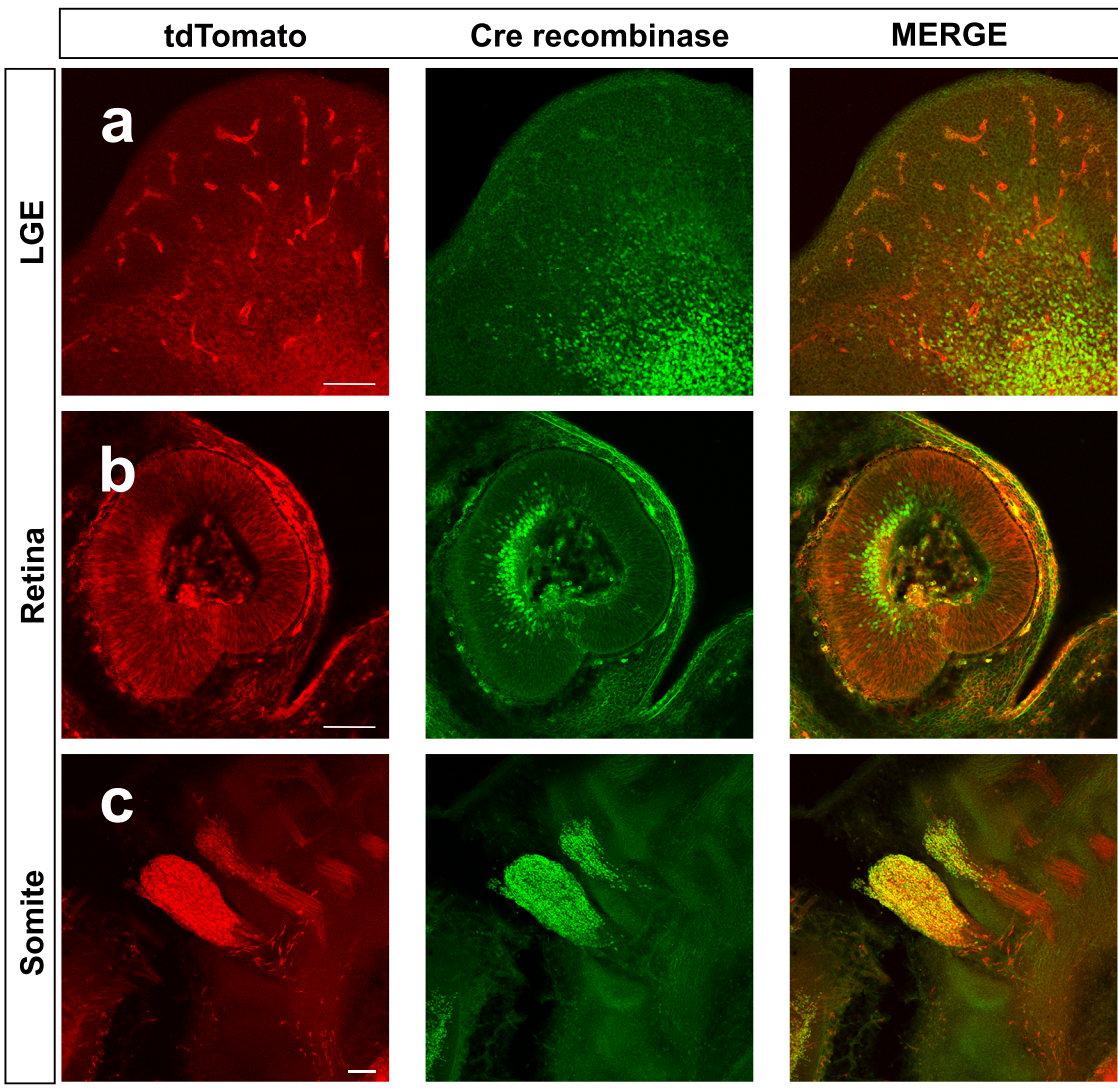

Supplement: supfig2_isl1-cre_e11_5_resub_bhab152.pdf [file supfig2_isl1-cre_e11_5_resub_bhab152.pdf]

Isl1-Cre:tdTom; Nkx2.1<sup>GFP/+</sup>

ROSTRAL

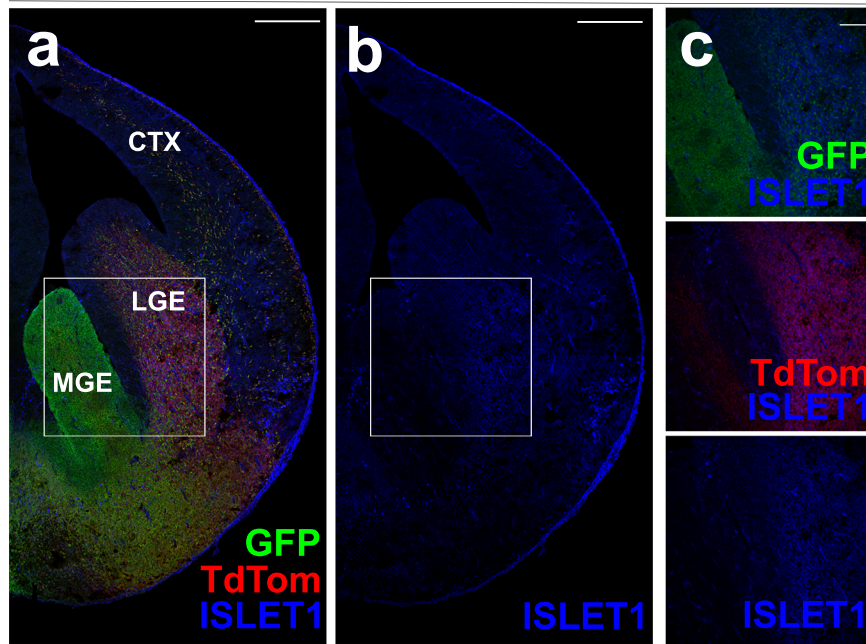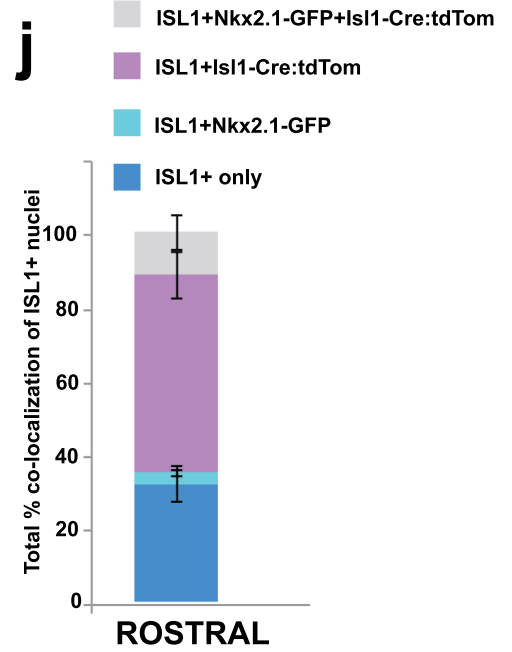

MEDIAL

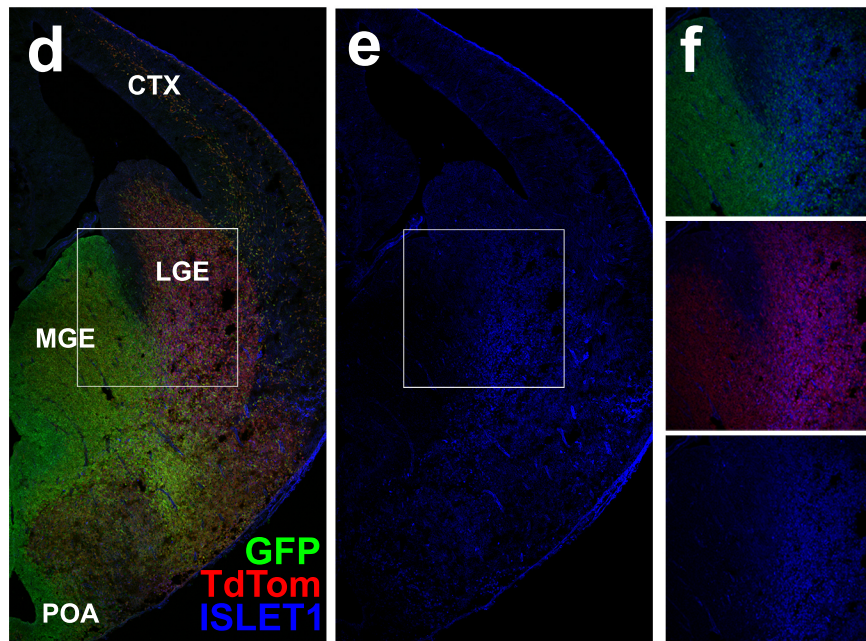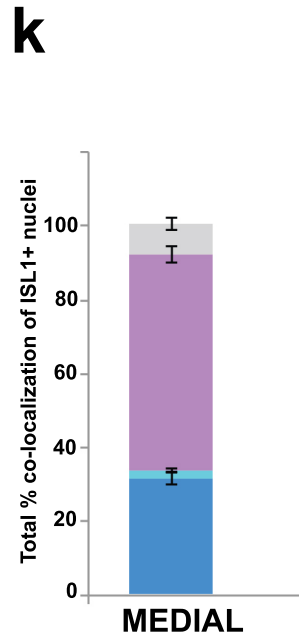

CAUDAL

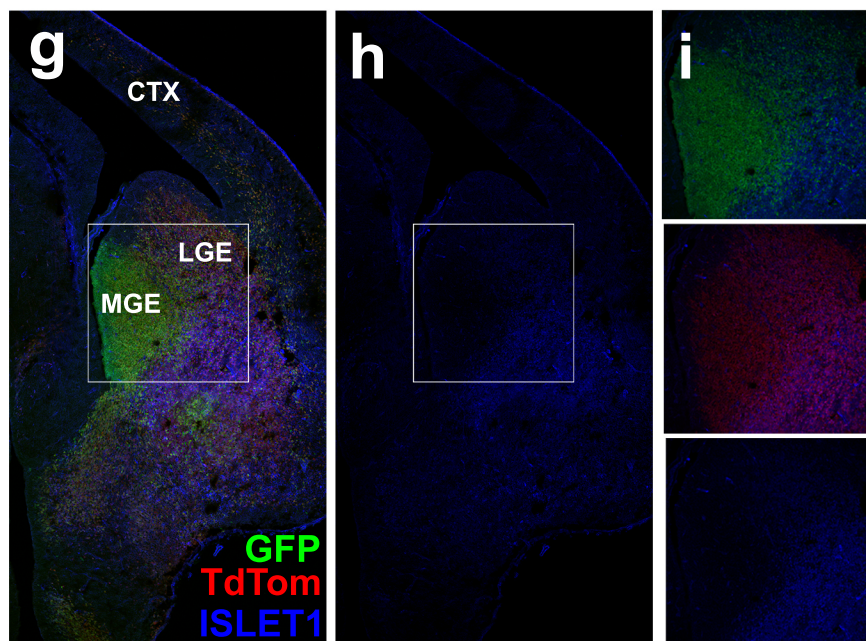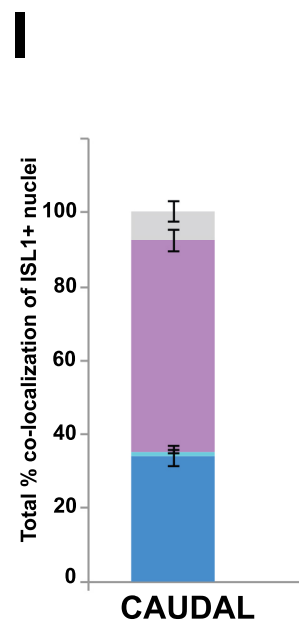

Supplement: supfig3_islet_immuno_het_bhab152.pdf [file supfig3_islet_immuno_het_bhab152.pdf]

ROSTRAL

MEDIAL

CAUDAL

Isl1-Cre:tdTom; Nkx2.1<sup>GFP/+</sup>

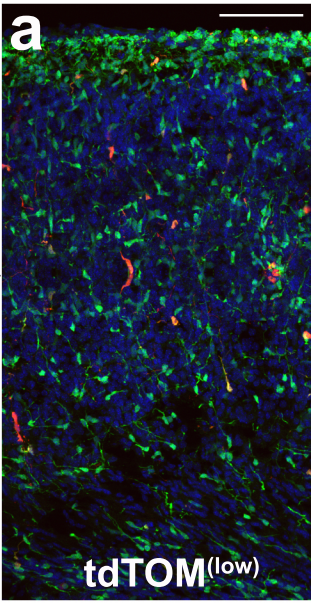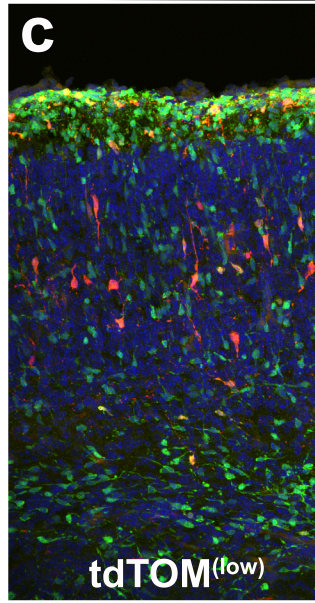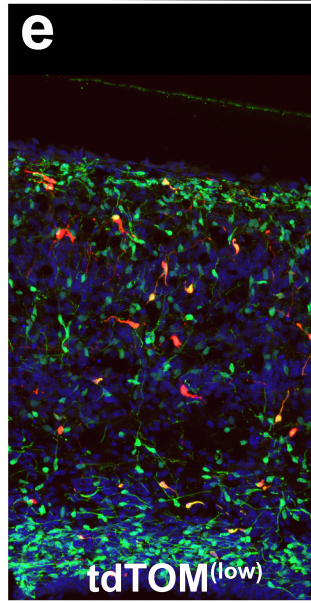

Isl1-Cre:tdTom; Nkx2.1<sup>GFP/+</sup>

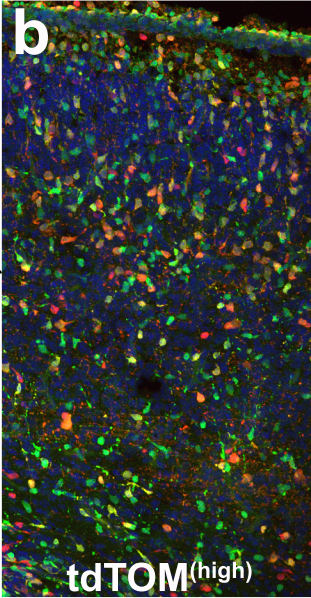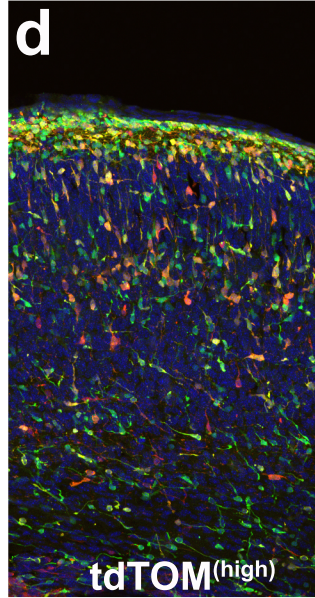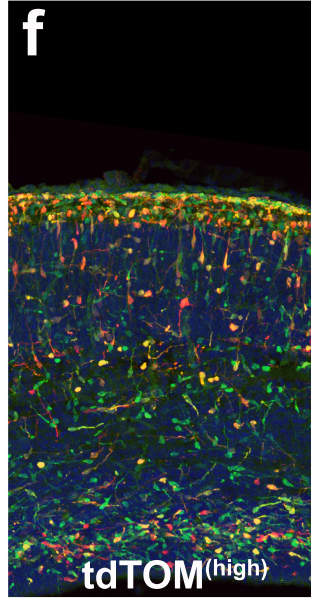

Supplement: supfig4_low_high_expr_het_bhab152.pdf [file supfig4_low_high_expr_het_bhab152.pdf]

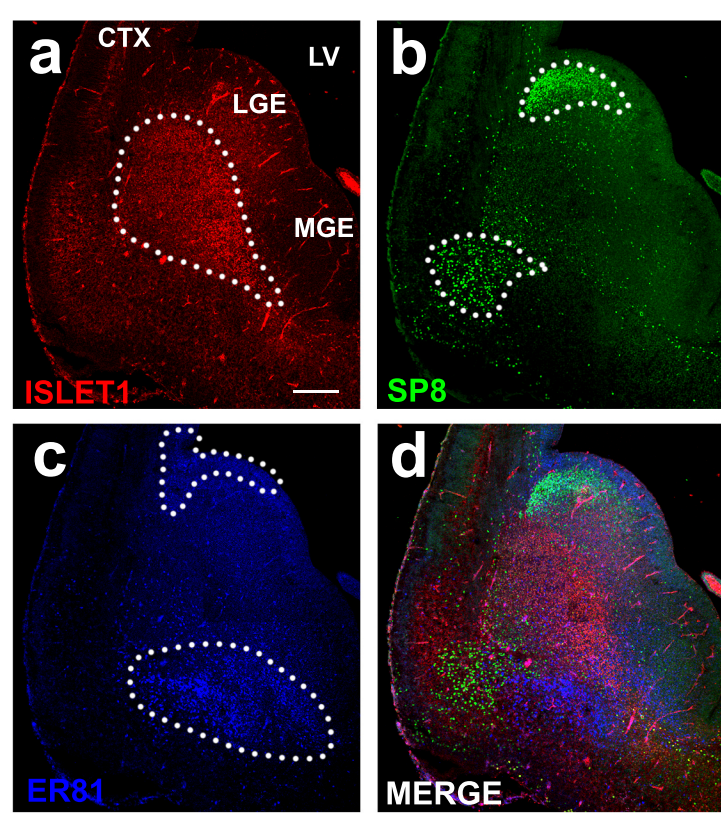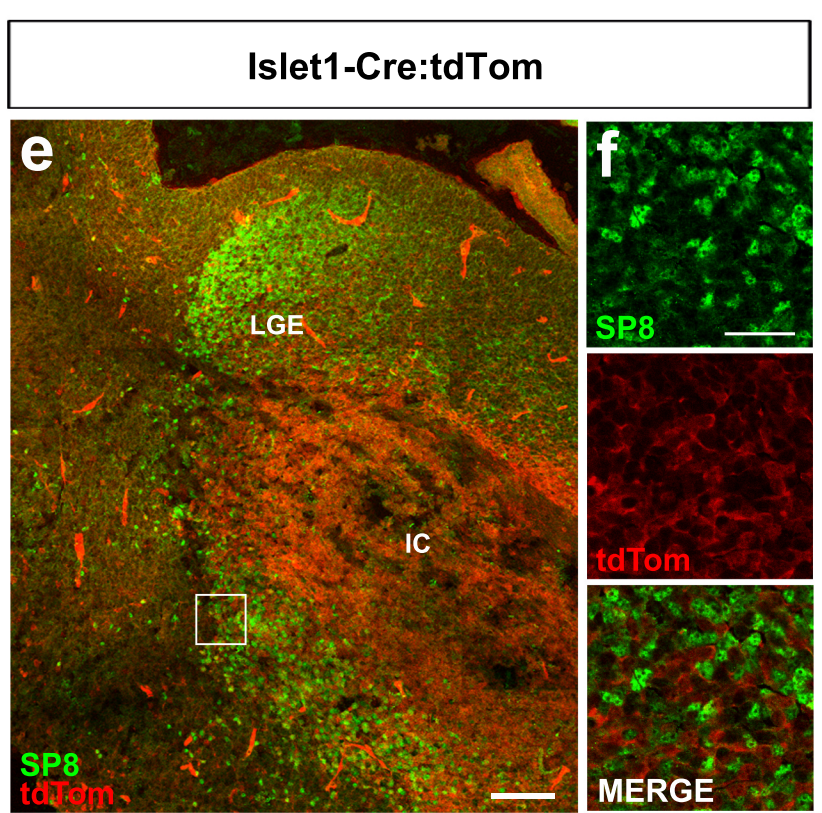

Supplement: supfig5_sp8_tfs_resub_bhab152.pdf [file supfig5_sp8_tfs_resub_bhab152.pdf]

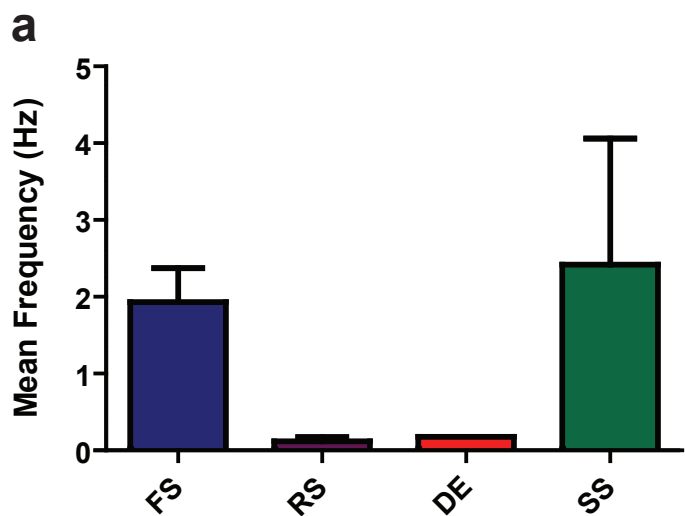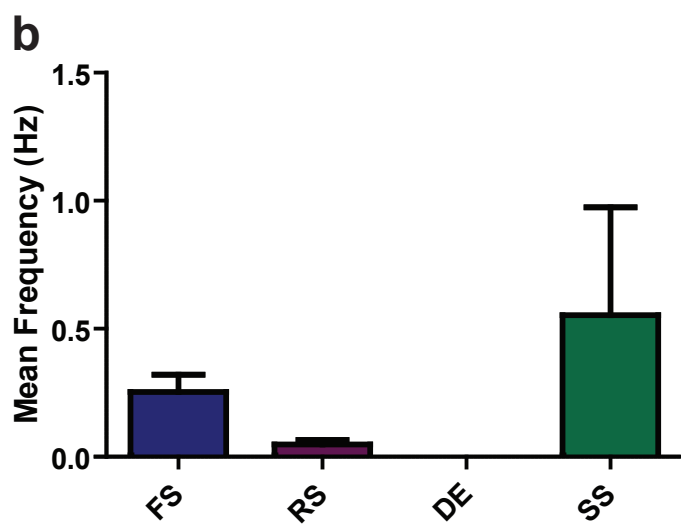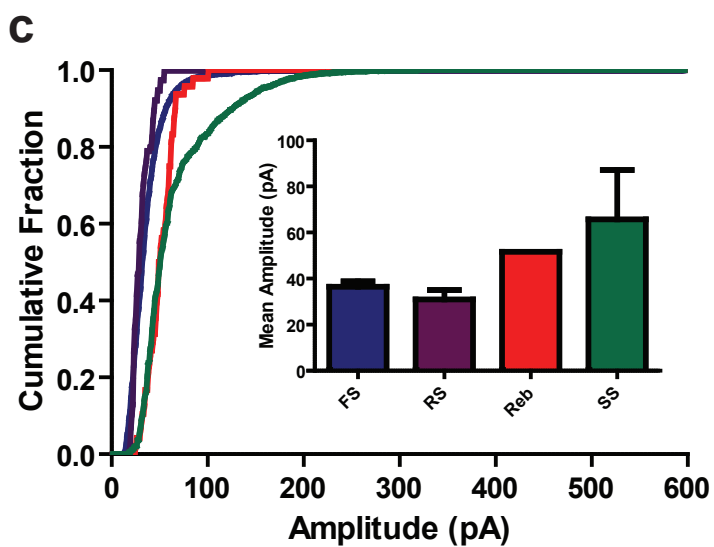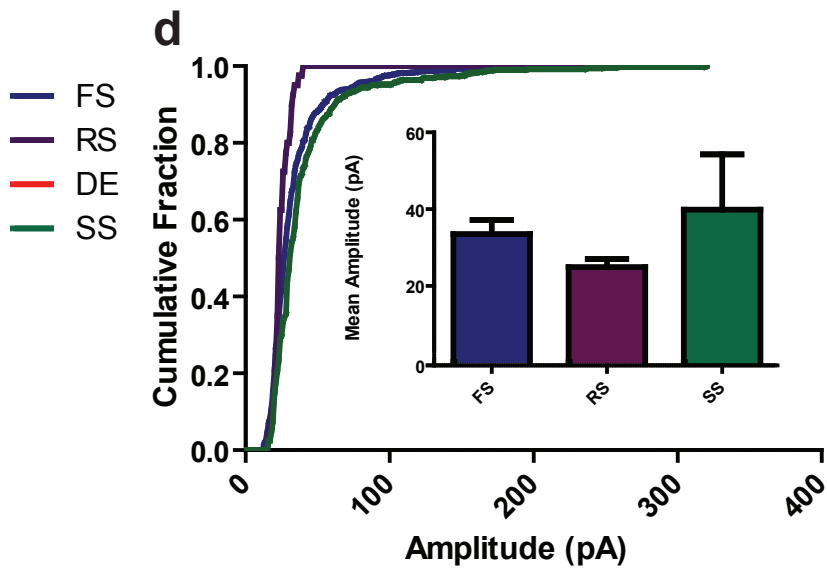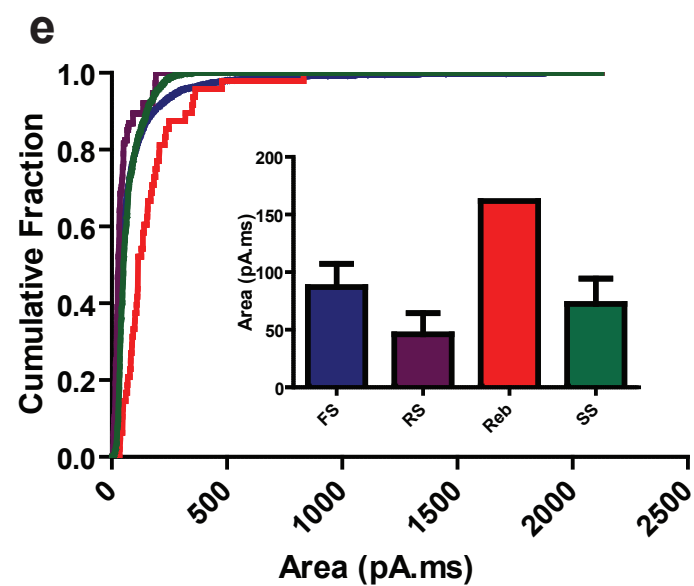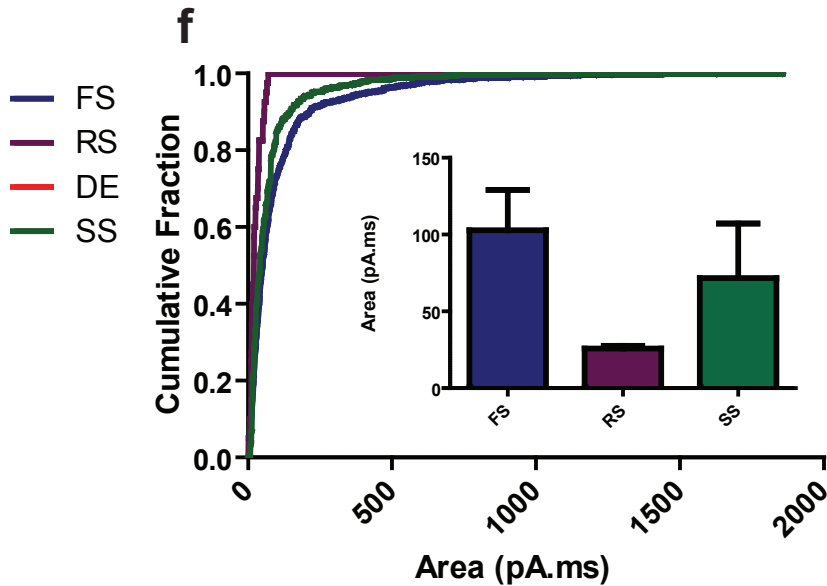

Supplement: supfig7_freqepscipsc_cctx_final_bhab152.pdf [file supfig7_freqepscipsc_cctx_final_bhab152.pdf]
